# Supplementary material
Source: PubMed Central journal article supplement (PMC10018777)
Supplement: NIHMS1867319-supplement-SM.pdf [file NIHMS1867319-supplement-SM.pdf]

## Supplemental material

Search strategy:

A complete search strategy for Embase.com is provided as an example: 'homeless person'/de OR "homeless people" OR "homeless persons" OR "homeless population" OR "street people" OR "vagabond" OR "homeless person" OR "homeless people" OR "homeless persons" OR "homeless population" OR "street people" OR "vagabond" OR 'homeless man'/exp OR "homeless men" OR 'homeless woman'/exp OR "homeless women" OR "Homeless Persons" OR "Homeless Person" OR "Persons, Homeless" OR "Homeless Shelters" OR "Homeless Shelter" OR "Shelter, Homeless" OR "Shelters for Homeless Persons" OR "Street People" OR "People, Street" OR "Homelessness" AND 'dementia'/de OR "amentia" OR "demention" OR 'Alzheimer disease'/exp OR "Alzeimer disease" OR "Alzeimers disease" OR "Alzeimers disease" OR "Alzheimer dementia" OR "alzheimer fibrillary change" OR "alzheimer fibrillary lesion" OR "alzheimer neurofibrillary change" OR "alzheimer neurofibrillary degeneration" OR "alzheimer neuron degeneration" OR "alzheimer perusini disease" OR "alzheimer sclerosis" OR "alzheimer syndrome" OR "alzheimers disease" OR "Alzheimers disease" OR "cortical sclerosis, diffuse" OR "dementia, alzheimer" OR "diffuse cortical sclerosis" OR "late onset alzheimer disease" OR 'diffuse Lewy body disease'/exp OR "dementia with Lewy bodies" OR "dementia with Lewy body" OR "DLB (dementia with Lewy bodies)" OR "DLBD" OR "LBD (Lewy body disease)" OR "Lewy body dementia" OR "Lewy body dementias" OR "Lewy body disease" OR "Lewy body diseases" OR 'frontotemporal dementia'/de OR "dementia, frontotemporal" OR "frontal dementia" OR "frontal lobe dementia" OR "frontotemporal dementias" OR "frontotemporal lobar degeneration" OR "FTD (frontotemporal dementia)" OR "FTLD" OR "Pick complex" OR "Picks complex" OR 'frontal variant frontotemporal dementia'/exp OR "behavioral variant frontotemporal dementia" OR "behavioral variant FTD" OR "behavioral variant of

## Supplemental material

frontotemporal dementia" OR "behavioral variant of FTD" OR "behavioural variant frontotemporal dementia" OR "behavioural variant FTD" OR "behavioural variant of frontotemporal dementia" OR "behavioural variant of FTD" OR "bvFTD" OR "frontal variant FTD" OR "frontal variant of frontotemporal dementia" OR "frontal variant of FTD" OR "fvFTD" OR 'HIV associated dementia'/exp OR "AIDS dementia" OR "AIDS dementia complex" OR "AIDS encephalopathy" OR "AIDS related dementia" OR "HIV 1 associated cognitive motor complex" OR "HIV 1 associated dementia" OR "HIV associated cognitive motor complex" OR "HIV associated neurocognitive disorder" OR "HIV dementia" OR "HIV encephalopathy" OR "HIV related dementia" OR "human immunodeficiency virus 1 associated dementia" OR "human immunodeficiency virus associated dementia" OR 'mixed depression and dementia'/exp OR "mixed dementia and depression" OR "mixed dementia depression" OR "mixed dementia-depression" OR "mixed depression dementia" OR "mixed depression-dementia" OR 'multiinfarct dementia'/exp OR "dementia, multi-infarct" OR "dementia, multiinfarct" OR "dementia, vascular" OR "multi-infarct dementia" OR "vascular dementia" OR 'tauopathy'/exp OR "tauopathies."
